1 *doepipeline*: a systematic approach to optimizing multi-  
2 level and multi-step data processing workflows

3 Daniel Svensson<sup>1,§</sup>, Rickard Sjögren<sup>1,2,§</sup>, David Sundell<sup>3</sup>, Andreas Sjödin<sup>3</sup>, Johan Trygg<sup>1,2,\*</sup>

4 1. Department of Chemistry, Computational Life Science Cluster (CLiC), Umeå University,  
5 Umeå, Sweden

6 2. Corporate Research, Sartorius AG, Umeå, Sweden

7 3. Division of CBRN Security and Defence, FOI - Swedish Defence Research Agency, Umeå,  
8 Sweden

9 § These authors contributed equally to this work

10 \* Corresponding author

11 Johan Trygg: [johan.trygg@umu.se](mailto:johan.trygg@umu.se)

## 12 Abstract

### 13 Background

14 Selecting the proper parameter settings for bioinformatic software tools is challenging. Not  
15 only will each parameter have an individual effect on the outcome, but there are also potential  
16 interaction effects between parameters. Both of these effects may be difficult to predict. To  
17 make the situation even more complex, multiple tools may be run in a sequential pipeline  
18 where the final output depends on the parameter configuration for each tool in the pipeline.  
19 Because of the complexity and difficulty of predicting outcomes, in practice parameters are  
20 often left at default settings or set based on personal or peer experience obtained in a trial and  
21 error fashion. To allow for the reliable and efficient selection of parameters for bioinformatic  
22 pipelines, a systematic approach is needed.

### 23 Results

24 We present *doepipeline*, a novel approach to optimizing bioinformatic software parameters,  
25 based on core concepts of the Design of Experiments methodology and recent advances in  
26 subset designs. Optimal parameter settings are first approximated in a screening phase using a  
27 subset design that efficiently spans the entire search space, then optimized in the subsequent  
28 phase using response surface designs and OLS modeling. *doepipeline* was used to optimize  
29 parameters in four use cases; 1) de-novo assembly, 2) scaffolding of a fragmented genome  
30 assembly, 3) k-mer taxonomic classification of Oxford Nanopore Technologies MinION  
31 reads, and 4) genetic variant calling. In all four cases, *doepipeline* found parameter settings  
32 that produced a better outcome with respect to the characteristic measured when compared to  
33 using default values. Our approach is implemented and available in the Python package  
34 *doepipeline*.

35 **Conclusions**

36 Our proposed methodology provides a systematic and robust framework for optimizing  
37 software parameter settings, in contrast to labor- and time-intensive manual parameter  
38 tweaking. Implementation in *doepipeline* makes our methodology accessible and user-  
39 friendly, and allows for automatic optimization of tools in a wide range of cases. The source  
40 code of *doepipeline* is available at <https://github.com/clicumu/doepipeline> and it can be  
41 installed through conda-forge.

42 **Keywords**

43 Design of Experiments, Optimization, Sequencing, Nanopore, MinION, Assembly,  
44 Classification, Scaffolding

45

## 46 Background

47 Bioinformatic software tools frequently offer a number of outcome-related parameters for the  
48 user to set or change from their default values. These parameters may be different forms of  
49 input filters, or alter the behavior of the running algorithm. Parameters may be either  
50 quantitative or qualitative (multi-level) in nature. While it is advantageous to customize tools  
51 to a specific situation, it is not always obvious what effect changing parameters will have on  
52 the outcome. This may be due to lack of documentation, poor understanding of the algorithm,  
53 or interaction effects between parameters that are difficult to foresee. Additionally, software  
54 tools are commonly combined into pipelines, for example when calling genetic variants from  
55 raw sequence reads [1,2]. Pipelining tools in this manner further increases the complexity of  
56 selecting optimal parameter settings by increasing the numbers of both parameters and  
57 potential interaction effects. The settings for a particular data processing pipeline may also  
58 have to be tailored to the type of technology that was used to generate the data, for example  
59 the different platforms available for DNA sequencing which yield different error profiles [3].  
60 In general, the strategy for selecting parameter settings therefore typically consists of using  
61 values derived from personal or peer experience and obtained in a trial-and-error fashion, or  
62 simply retaining the default values. This kind of non-systematic selection of parameter  
63 settings runs the risk of producing sub-optimal results.

64 The combined ranges of all possible parameter settings form a parameter space. To find the  
65 optimal point in the parameter space, an exhaustive brute-force search, commonly called a  
66 grid search, simply trying all possible combinations, is guaranteed to find the optimum. Since  
67 the number of combinations increases exponentially, exhaustive searching quickly becomes  
68 unfeasible as the number of parameters, and their ranges, grow. Instead, statistical Design of  
69 Experiments (DoE) can be used to span and investigate the parameter space in an efficient  
70 manner [4]. DoE aims to maximize information gain while minimizing the number of

71 experiments required [5]. This is done by introducing variation into the system under  
72 investigation in a structured manner in order to explain how the parameters (*factors*)  
73 influence the result (*response*). This variation is introduced according to statistical designs for  
74 simultaneously varying the factor settings at a specific set of values (*levels*), and the system is  
75 modeled using statistical methods, for example with Ordinary Least Squares (OLS)  
76 regression [5–7]. The simplest type of statistical design is the full factorial design (FFD)  
77 where all combinations of factor levels are investigated in an exhaustive manner, meaning  
78 that they quickly become impracticable. To greatly reduce the number of experiments  
79 required, fractional factorial designs (FrFD) are used to investigate a structured subset of the  
80 FFD [6]. The problem is that FrFD are not trivial to use in situations where there are more  
81 than two levels to investigate, and that there is no obvious way to combine qualitative and  
82 quantitative variables. Recently, fractional factorial designs have been generalized into the so  
83 called generalized subset design (GSD) [8]. GSDs are balanced and near-orthogonal multi-  
84 level and multi-factor subset designs capable of mixing quantitative and qualitative factors,  
85 allowing for the investigation of a large and diverse set of parameters in an efficient manner.  
86 Compared to grid search, GSDs reduce the number of runs required to explore an equivalent  
87 parameter space by an integer factor, also called the *reduction factor*.

88 Although DoE is primarily used in analytical chemistry, a DoE approach has previously been  
89 applied by Eliasson et al to optimize software parameter settings in a liquid chromatography-  
90 mass spectrometry (LC-MS) metabolomics data processing pipeline [9]. In essence, this  
91 approach consists of sequentially updating a statistical design based on the predicted optimal  
92 configuration of settings, until they converge at an optimum. We build upon the approach  
93 proposed by Eliasson et al, and have developed a strategy for automated optimization of  
94 software parameter settings. We extend Eliasson et al's approach with a screening phase  
95 using the recently developed GSD to efficiently span a much larger parameter space. We also

96 make it possible to optimize multiple responses simultaneously. This extended approach may  
97 be used both for optimization of individual tools and for multiple tools organized into a  
98 pipeline. One crucial component is a well-defined objective function that you wish to  
99 minimize or maximize, i.e. there must be some way to objectively determine how well the  
100 pipeline is performing. Our strategy is software-agnostic and is implemented as a user-  
101 friendly Python package - *doepipeline*.

102 In this article, we outline our DoE-based strategy for a systematic approach to optimizing  
103 multi-level and multi-step data processing workflows, and exemplify the application of  
104 *doepipeline* with four cases; 1) de-novo assembly of a bacterial genome, 2) scaffolding of  
105 contiguous sequences (contigs) of a bacterial genome using 3rd generation sequencing  
106 (nanopore) data, 3) k-mer taxonomic classification of long noisy sequence reads generated by  
107 ONT MinION sequencing units, and 4) genetic variant calling in a human sample.

## 108 **Methods**

109 We propose an approach for the optimization of software parameters, based on methods  
110 derived from statistical design of experiments. Our approach, which has been implemented in  
111 a python package (*doepipeline*), can be divided into two distinct phases:

- 112 1. Screening using a generalized subset design to find an approximate optimum. This  
113 phase also serves to find the best choice of categorical variables.
- 114 2. Iterative optimization, starting from the best point found by screening, based on the  
115 algorithm by Eliasson et al[9]. This phase optimizes only quantitative variables,  
116 meaning that categorical variables are fixed at the best values found during phase 1.

117 The screening and optimization phases are schematically illustrated in Figure 1 and described  
118 in more detail in the following subsections. Prior to screening and optimization, the user  
119 specifies what parameters to use as factors in the designs, whether they are categorical or

120 numerical, and the permitted categories or value spans to be investigated. The user also  
121 specifies what process outcomes to use as response, and whether it should be maximized,  
122 minimized or reach a target value. In cases with several responses the user also needs to  
123 specify low/high limits and the target for each response. The responses are then re-scaled  
124 according to these limits and targets and combined into a single response using the geometric  
125 mean according to Derringer & Suich desirability functions [10]. In brief, when there are  
126 multiple responses each individual response is rescaled to be in the interval between 0 and 1,  
127 and it is 0 when outside accepted limits and 1 when better than the target. The rescaled  
128 responses are then combined into the overall desirability using the geometric mean.

129 **Figure 1 - Schematic visualization of *doepipeline* design space movement.** Example of  
130 optimization of two factors (A and B) through both the screening and the optimization phase,  
131 completed in 3 iterations. Each dot represents an executed pipeline with the parameters set by  
132 factors A and B. Triangles represent executed pipelines using the optima of an Ordinary  
133 Least Squares (OLS) model calculated in each optimization iteration. Red dots and triangles  
134 represent the best configuration of factors found in each iteration. Dashed lines represent the  
135 current high and low parameter settings in each iteration. *Screening phase*: a GSD using three  
136 levels and a reduction factor of 2 is used to span the design space. The pipelines are executed  
137 with the factor configurations suggested by the GSD and an approximate optimum is found  
138 (red dot). *Optimization phase*: in iteration 2, an optimization design is created around the best  
139 configuration found in the screening phase (black dots). In iteration 3, the design space is  
140 moved in the direction of the configuration of factors that produced the best result (red  
141 triangle) in iteration 2. *doepipeline* halts when the best response is produced by a  
142 configuration of factors that lies close to the center point (red triangle in iteration 3).

## 143 **Screening for Approximate Optimum**

144 The purpose of the screening phase is to span the full search space to find regions with close  
145 to optimal performance. Screening is performed by executing the specified pipeline using  
146 combinations of factor configurations given by a GSD. Using a GSD effectively reduces the  
147 number of experiments to run, while optimally spanning the search space (Fig. 1a). The  
148 number of experiments required to investigate a given set of factors at a number of levels is  
149 approximately an integer fraction of the total number of possible combinations, which  
150 depends on the number of factors and their levels. A greater number of levels increases the  
151 resolution of the space searched during screening but also exponentially increases the number  
152 of runs required. We have found that five levels per numeric factor span large search spaces  
153 with a high enough resolution to give satisfactory results, but it is possible to set the number  
154 of levels individually for each factor in *doepipeline*. Similarly, we have found that the integer  
155 fraction of the full design that the GSD should represent can be safely set at the number of  
156 factors included in the design. However, this may also be controlled by the user by means of  
157 the *reduction factor* setting in *doepipeline*.

158 The screening phase also serves the purpose of setting the category to use for each categorical  
159 variable. For subsequent optimization, qualitative factors are fixed at the category of the best  
160 factor configuration according to the screening. By fixing qualitative factors, only numeric  
161 factors are investigated during the following optimization phase.

## 162 **Optimization of Numeric Factors**

163 After selecting the best factor configuration during screening, numerical factors are optimized  
164 using response surface designs. The levels used in the screening design are here applied as  
165 anchor points for the new optimization design. A response surface design, for instance a  
166 central composite design, is constructed around the best configuration found. That is, the



167 configuration of factor levels found to produce the best result during the screening phase is  
168 initially set as the center point in the new response surface design (Fig. 1b). If this  
169 configuration lies at the edge of a factor's global design space (as defined by its min and max  
170 allowed values), the factor's center point is shifted to the nearest screening level instead. This  
171 is done in order to keep the design within the global design space. After having set the center  
172 point for the new design, the high and low settings for each numeric factor are set to lie at the  
173 midpoints between the nearest screening levels respectively above and below the chosen  
174 center point, as indicated by the dashed line in Figure 1b. The span of each factor is then  
175 defined as the difference between the high and low settings. As during screening, the  
176 specified pipeline is executed using factor configurations given by the response surface  
177 design.

178 During each optimization iteration, pipeline performance is approximated using OLS  
179 regression [7]. By fitting a regression model the optimal configuration can be found by  
180 optimizing the response predicted according to the model. The factors included in the OLS  
181 model are selected either using a best subset approach or by using greedy forward selection;  
182 the latter is preferred when more than four factors are included in the design. If the predictive  
183 power ( $Q^2$ ) of the model is acceptable ( $Q^2 > 0.5$ ), the model is used to predict an optimal  
184 parameter configuration. Each numeric factor's settings are then updated based on the best  
185 result in a manner similar to the algorithm given by Eliasson et al [9]. For each factor, the  
186 difference between the predicted best factor setting and the factor center point is calculated. If  
187 this distance is greater than 25% of the span of the factor, the high and low settings of the  
188 factor are updated in the direction of the best result. The default step length is 25% of the  
189 span of the factor, i.e. the high and low settings are moved 25% of the step length (Fig. 1b,  
190 iteration 3). We found that the algorithm did not always converge at this stage, but moved the  
191 design space back and forth between iterations. To alleviate this problem, we implemented

192 design space shrinkage, which shrinks the design space span through multiplication by a so  
193 called *shrinkage factor* (typical value is 0.9, corresponding to 10 % shrinkage) between  
194 iterations, and found that it successfully improved convergence. If the proposed updated  
195 factor settings lie outside the predefined design space limits, the design is instead placed at  
196 the factor limits while keeping the same factor span. If the design has not moved between two  
197 iterations, or the best response is not improved upon compared to the previous iteration, the  
198 algorithm has converged and halts. If the optimization algorithm halts and responses have not  
199 reached their minimally acceptable values, the screening results are re-evaluated and a new  
200 optimization phase is run based on the results of the next best screening. At the end of the  
201 optimization iterations the factor configuration that has produced the best result throughout  
202 the iterations is chosen as the optimal configuration.

### 203 **Sequence data used in cases**

204 The *Francisella tularensis* sp. *holarctica* strain FSC200 [11], and a genetic near neighbor  
205 *Francisella hispaniensis* strain FSC454 were chosen as an example dataset in case 1 to 3 of  
206 this study. The genome assembly of FSC200 is available as RefSeq assembly accession  
207 GCF\_000168775.2 and genome assembly of FSC454 as RefSeq assembly accession  
208 GCF\_001885235.1. Previously, generated Illumina HiSeq reads of FSC200 are available as  
209 NCBI SRA run SRR518502. This latter dataset was subsampled down to an estimated  
210 coverage of 100X (1.9M 100bp reads) for use in case 1, subsampling was performed with  
211 *seqtk* [12](v. 1.2-r94, installed through bioconda [13]).

212 New sequencing libraries were prepared from DNA extractions of the two bacterial strains  
213 using the SQK-LSK108 Ligation Sequencing Kit according to the manufacturer's  
214 specifications and then sequenced using a FLO-MIN107 MinION flow cell (Oxford  
215 Nanopore Technologies, UK). MinION sequence reads for FSC200 are available as NCBI

216 SRA run SRR9290761, and for FSC454 as NCBI SRA run SRR9290851. Subsampling down  
217 to 50 000 from 132 259 MinION reads for FSC200 and 15 000 from 15757 MinION reads for  
218 FSC454 was performed with a custom script, and the sequences were trimmed to a maximum  
219 length of 3000 bp as well as being sorted by length to increase classification speed.

## 220 **Case 1: de-novo assembly of a bacterial genome**

221 In this example, we optimize the paired-end sequence assembler ABySS [14,15] (v. 2.0.2,  
222 installed through bioconda [13]) to assemble the genome of an isolate of *Francisella*  
223 *tularensis* ssp. *holarctica* (FSC200). ABySS has a total of 27 different parameters that can be  
224 specified by the user. Some are directly related to the running time and memory usage of the  
225 software (such as number of threads to use or bloom filter size), while others are related to  
226 the quality and/or characteristics of the resulting assembly (such as the size of k-mer or the  
227 minimum mean k-mer coverage of a unitig). For this example, we focused on the latter type  
228 of parameter. Hence, all parameters chosen to be part of the optimization were deemed to  
229 have a potential effect on the resulting assembly. The chosen parameters were: size of k-mer  
230 ( $k$ ) (KMER), minimum mean k-mer coverage of a unitig ( $c$ ) (MIKC), minimum alignment  
231 length of a read ( $l$ ) (MIAL), and minimum number of pairs required for building contigs ( $n$ )  
232 (MIPA).

233 For this optimization we set the investigated factor space so that the default value for each  
234 factor was included within the span of each factors' min and max values (Table 1). Although  
235 central to the ABySS algorithm, there is no default value for the k-mer size parameter. But  
236 since the value of the k-mer size is bounded by the actual read length it was still possible to  
237 define the GSD search space in a satisfactory way. For purposes of comparison, however, we  
238 considered a k-mer size of 31 to be the default setting. In this example we ran the initial  
239 screening with a reduction factor of 8, and used Central Composite Face-centered (CCF)

240 designs in the following optimization iterations. We used a shrinkage factor of 0.9 (*-s*), and  
241 set the model selection method (*-m*) to greedy to speed up model selection. All other  
242 *doepipeline* settings were kept at default values.

243 There are many metrics that can be used to evaluate the quality of a de-novo assembly, and  
244 which specific ones to use depends on what the assembly is to be used for [16,17]. Example  
245 metrics include the number of resulting contiguous sequences (contigs), the amount of total  
246 sequence covered by the assembly, and the N50 value. The latter is the length of the contig  
247 that, when the contigs are ordered by size, spans the midpoint of the total assembly. Hence,  
248 the N50 value can be viewed as an assessment of the quality of the assembly in terms of  
249 contiguity.

250 We used the total size of the assembly (tSeq), the number of contigs (nSeq), and the N50  
251 value as responses. Since this optimization contained multiple responses, it was necessary to  
252 set low/high acceptable limits for each response, as well as target values to reach. The low  
253 and high limits for the responses were set with respect to the result obtained using the default  
254 settings with the same input data, meaning that the worst acceptable results are the default  
255 results. The target for the tSeq response was set to the reference genome size for FSC200  
256 [11], while the targets for the nSeq and N50 responses were set to values that were  
257 considered achievable (Table 2).

258 The data input to ABySS consisted of the subsampled Illumina HiSeq 2500 sequence data for  
259 FSC200 (see Sequence data used in cases). Prior to calculating the values for the responses  
260 we applied a length-based filter to the assembly using *Fastaq* [18] (v. 3.17.0), keeping only  
261 those contigs more than 1000 bp in length. This filter was also applied when calculating the  
262 response from the pipeline using the default parameter configuration. This is done because  
263 the very short contigs are typically made up of short repetitive sequences, and removing them

264 simplifies the assembly graph and calculations on it. The software *seqstats* [19] was used to  
265 calculate the response values from the filtered assembly.

## 266 **Case 2: scaffolding of a bacterial genome assembly using long reads**

267 Assembling a genome with short reads typically results in a fragmented assembly, consisting  
268 of a number of contigs. The way these contigs are connected with each other - in terms of  
269 ordering, distance, and direction - remains unknown. The reason for the fragmentation is that  
270 certain stretches of genomes have low complexity and are therefore impossible to resolve  
271 with short reads. One way of stitching together the contigs of an assembly is by using paired  
272 reads with long insert sizes, or - as is increasingly common - using long reads from, for  
273 example, the Nanopore or PacBio platforms. The long reads have an increased chance of  
274 spanning the low-complexity regions, effectively anchoring both ends of a pair of contigs  
275 together and thus resolving the gap. The process of connecting contigs together is referred to  
276 as scaffolding, and the resulting sequences are known as scaffolds.

277 SSPACE-LongRead [20] (SSPACE) uses long reads, such as those produced by the PacBio  
278 or Nanopore platforms, to scaffold an assembly. When running the software, the user can  
279 manipulate a total of six parameters that relate to the resulting scaffolds. We investigated  
280 whether manipulating some of the parameters would yield a better result than that achieved  
281 by running SSPACE (v. 1-1) with default parameter settings. We chose to optimize the  
282 minimum alignment length to allow a contig to be included for scaffolding (*a*) (ALEN), the  
283 minimum gap between two contigs (*g*) (GLEN), the maximum link ratio between the two  
284 best contig pairs (*r*) (RRAT), and the minimum identity of the alignment of the long reads to  
285 the contig sequences (*i*) (IDEN). As response, we maximized the N50 value of the resulting  
286 scaffolded assembly.

287 We set the investigated space for the factors so that the default value for each factor was  
288 included within the span of each factor's min and max values (Table 3). For the optimization  
289 phase following the screening phase we chose to use a CCF design for the experiments. The  
290 reduction factor for the GSD was kept at the default value, i.e. the number of factors in the  
291 investigation, which in this case was 4. The model selection method (*-m*) was set to greedy  
292 and the shrinkage factor (*-s*) to 0.9. All other *doepipeline* settings were kept at default values.

293 The input assembly had been constructed with ABySS [15] (v. 2.0.2) (k=71) and subjected to  
294 a contig length filter (>1000 bp). It consisted of 94 contigs between 1,685 and 87,479 bp in  
295 length, had an N50 of 27,549 bp, and totaled 1,800,912 bp prior to scaffolding. The assembly  
296 was constructed from the FSC200 Illumina HiSeq 2500 sequence data (see Sequence data  
297 used in cases). We include the assembly at the *doepipeline* github repository. The read set  
298 used for scaffolding consisted of 132,258 nanopore reads of between 163 and 108,214 bp in  
299 length (N50=679 bp), totaling 104,374,862 bp. *Seqstats* [19] was used to calculate the  
300 response from the scaffolded assembly.

### 301 **Case 3: k-mer classification**

302 K-mer classification is a method used to assign taxonomic labels to short DNA sequence  
303 reads [21]. The method requires a precomputed database of k-mers generated from previously  
304 known and assembled genomes, for example all complete genomes in the NCBI database.  
305 When classifying a sample, the k-mer set of each read is calculated and compared with the  
306 database of known k-mers. The read is then assigned to the most specific taxonomic class  
307 within the database using the highest scoring k-mer root-to-leaf classification path following  
308 the taxonomic hierarchy. This method is implemented in, for example, the software package  
309 Kraken [22].

310 Kraken also uses a least common ancestor method, which re-classifies reads that are assigned  
311 to multiple taxonomic sub-classes under a parent node. A read with non-unique leaf  
312 assignment will then be assigned to the least common ancestor where there is little or no  
313 assignment conflict instead. The k-mer classification method implemented in Kraken can be  
314 applied to longer error-prone reads even though it is optimized for short accurate reads.  
315 However, it will be less accurate due to the different (higher) error frequencies and will  
316 therefore generate an increased rate of false positives.

317 In this study we used the software KrakenUniq [23] (v. 0.5.2). KrakenUniq builds upon the  
318 Kraken engine but additionally records the number of unique k-mers as well as coverage for  
319 each taxon. Three factors were used in the optimization: precision (PRES), minimum k-mer  
320 hits (MH) and a filter (FILT). We chose to use a CCF design in the optimization phase of  
321 *doepipeline*, the model selection method (-m) was set to greedy, and the shrinkage factor (-s)  
322 to 0.9. All other *doepipeline* settings were kept at default values. The F1 score (Eq. 1), which  
323 is the harmonic mean of precision and recall, was used as response.

$$324 \quad F1 = 2 \cdot \frac{(\textit{precision} \cdot \textit{recall})}{(\textit{precision} + \textit{recall})} \quad (\text{Eq. 1})$$

325 The input data were nanopore sequenced reads from two *Francisella* species, a target,  
326 *Francisella tularensis holarctica* (FSC200) and one near neighbor, *Francisella hispaniensis*  
327 (FSC454). The dataset was reduced to contain 50,000 *F. tularensis* reads and 15,000 (max) *F.*  
328 *holarctica* reads of maximum length 3000 bp, to increase the speed of classification and  
329 reduce potential bias (see Sequence data used in cases).

#### 330 **Case 4: genetic variant calling**

331 A single genetic difference with respect to a reference genome is referred to as a genetic  
332 variant, and the process of identifying these variants from sequence data is referred to as

333 variant calling. Calling the simplest form of genetic variant, single nucleotide variants (SNV),  
334 from standard Illumina paired-end data is considered trivial nowadays, with F1 scores  
335 reaching 0.98 [24]. Because of this, we opted to optimize calling of short insertions and  
336 deletions (indels), which are slightly more complex and are harder to call correctly [24].

337 We used raw sequence data and high-confidence genetic (or “truth”) variant calls from a  
338 single well-studied individual, commonly known as NA12878. The raw sequence data  
339 (2x100 bp, 50X depth), which form part of the Illumina Platinum Genomes (PG) [25], were  
340 retrieved from the European Nucleotide Archive (ENA), study accession ERP001960 (run:  
341 ERR194147). The truth callset was a “hybrid” dataset, meaning it was produced by  
342 combining callsets obtained with different technologies and methodologies [25–27] as  
343 described in Krusche et al [28]. The truth set was downloaded from the PG GitHub repository  
344 [29].

345 The genome analysis toolkit (GATK) best practices workflow [1,2] was used as a guide for  
346 this variant calling case. Raw data processing was carried out in accordance with GATK best  
347 practices up to the point of having analysis ready reads, after which *doepipeline* was applied  
348 to optimize the variant calling and filtering steps. First, PICARD (v. 2.18.1) [30] was used to  
349 convert the sequence reads (FASTQ format) into unmapped BAM format (uBAM) and to  
350 mark Illumina adapters. We then mapped the reads to the hg19 reference (part of the GATK  
351 resource bundle) using BWA-MEM (v. 0.7.15 -r1140) [31,32] and marked duplicates using  
352 PICARD. Finally, Base Quality Score Recalibration (BQSR) was carried out using GATK (v.  
353 3.8-1-0) [33] to obtain analysis-ready reads.

354 This case aimed to optimize variant calling and variant filtering, the remaining steps in the  
355 GATK best practices after obtaining analysis-ready reads. The calling was carried out using  
356 HaplotypeCaller, and the filtering was carried out using VariantFiltration, both tools within



357 GATK. HaplotypeCaller offers around 20 adjustable parameters while the VariantFiltration  
358 tool expects custom-specified cutoffs for annotations in the variant call format (VCF) file.  
359 GATK suggests four annotations by which to filter indels. In order to include a meaningful  
360 number of parameters at each step we chose to optimize the two steps sequentially.  
361 Performing sequential optimization allowed us to investigate 4 parameters for each step, 8 in  
362 total. We first optimized the calling step while keeping the parameters in the filtering step at  
363 their default settings. We then optimized the parameters for the filtering step using the output  
364 from the highest scoring experiment in the first step. For the calling step we chose to  
365 optimize the global assumed mismapping rate for reads (*globalMAPQ*) (GMQ), the minimum  
366 base quality for calling (*mbq*) (MBQ), the minimum reads per alignment start  
367 (*minReadsPerAlignStart*) (RAS), and the minimum confidence threshold for calling  
368 (*stand\_call\_conf*) (SCC). For the filtering step we chose to optimize the quality by depth  
369 (*QD*) (QD), the read position rank sum test (*ReadPosRankSum*) (RPRS), the Fisher test for  
370 strand bias (*FS*) (FS), and the strand odds ratio (*SOR*) (SOR). To further reduce the size of  
371 the optimization, we chose to optimize only against variants on chromosome 1. However, we  
372 screened for any overfitting of the parameters by executing the variant calling and filtering  
373 pipeline across all autosomes and chromosome X with the optimized parameters.

374 The following settings were used for both optimizations. We set the space investigated for the  
375 factors so that the default value for each factor was included within the span of each factor's  
376 min and max values (Table 5). The design of choice for the screening phase was the CCF  
377 design. The reduction factor for the GSD was increased to 8, reducing the number of  
378 experiments. The model selection method (*-m*) was set to greedy and the shrinkage factor (*-s*)  
379 to 0.9. All other *doepipeline* settings were kept at default values.

380 Performance metrics and tools to assess the accuracy of variant calling in a standardized  
381 manner are crucial, and the benchmarking team of the Global Alliance for Genomics and

382 Health (GA4GH) have made significant progress with respect to this [28]. The GA4GH  
383 benchmarking team has developed a benchmarking tool, hap.py [34], that can compare a  
384 high-confidence (or “truth”) variant callset with a user-made single-sample callset, also  
385 known as the query callset, and output performance metrics. For a certain set of confident  
386 regions (specified by BED file), concordant variants in the two callsets should be considered  
387 true positives (TP), while discordant variants should be considered either false positives (FP)  
388 or false negatives (FN) depending on which callset they appear in. Hap.py also outputs the F1  
389 score (see case 3 methods) for variants passing the VCF filters, which was used as the  
390 response in this case.

### 391 **Grid search comparison**

392 We compared the results from *doepipeline* to those from grid search, which is a common  
393 methodology for optimizing parameters. Grid search is done by evaluating the parameter  
394 performance for all possible combinations of parameter settings, the so-called parameter grid.  
395 For the comparison to be relevant, we performed the grid search at the same resolution as the  
396 GSD screening step in each case. In other words, we tested all possible combinations of the  
397 factor setting levels (typically 5 levels per factor).

### 398 *doepipeline*

#### 399 **Implementation**

400 *doepipeline* is fully implemented in the Python programming language and source code is  
401 available for download at github (<https://github.com/clicumu/doepipeline>) and installable  
402 with conda-forge [35,36] and through PyPi. Generation of statistical designs is carried out  
403 through the python package PyDOE2 [37], in which the GSD has been implemented.

## 404 **Usage**

405 Configuration of the optimization is done in a structured YAML file with sections for the  
406 experimental design and for the pipeline steps (commands) to run. The design section  
407 includes the names of the factors investigated and their min/max values (design space), the  
408 responses and their goals (minimize/maximize), and the type of design to use in the  
409 optimization phase. The pipeline section is where each individual pipeline step is specified.  
410 In each iteration, *doepipeline* takes the pipeline steps as configured and substitutes the  
411 parameters under investigation with the values given by the statistical design. A batch script  
412 is created for each pipeline step, with any parameter values substituted, and the execution of  
413 it is controlled by *doepipeline*. Pipeline steps are executed either in parallel mode, where all  
414 experiments are run at the same time, or in sequential mode where each pipeline with all of  
415 the steps is executed in sequence. For reference, we provide example YAML files at the  
416 github repository.

417 Today, scientific data processing can include vast amounts of data and/or require substantial  
418 computing power. In such cases, data processing is commonly performed on compute clusters  
419 that typically use some queueing system in order to handle all user requests for resources. An  
420 example of such a queueing system is the Slurm Workload Manager [38] (Slurm). To  
421 accommodate users of compute clusters, we have implemented Slurm support for  
422 *doepipeline*. If using Slurm, specify the Slurm options in the YAML file as you would when  
423 running a regular Slurm job. The Slurm options are transferred by *doepipeline* to the batch  
424 script which is then submitted to Slurm using *sbatch*.

425 After optimization, the parameter values suggested by *doepipeline* are saved in the working  
426 directory for the optimization. Additionally, there is a rich log file that can be investigated to  
427 follow the workflow.

## 428 Results

### 429 **Case 1: de-novo assembly of a bacterial genome**

430 The goal of de-novo assembly is to combine raw sequence reads into a representation of an  
431 organism's genome, i.e. to obtain as contiguous a genomic sequence as possible. Due to the  
432 characteristics of the genome sequence itself, in combination with short reads, this process  
433 can be difficult. For example, sequence reads from less complex segments of the genome will  
434 map to more than one position, causing ambiguities that are not possible to resolve, and this  
435 in turn leads to fragmentation of the assembly.

436 One popular sequence assembler is ABySS [15], which provides 27 different user-controlled  
437 parameters. We set up an example for optimization of de-novo assembly software parameters  
438 using ABySS (see Methods section). *doepipeline* ran for two iterations before halting. Thus,  
439 the best response was obtained in the first iteration, in the GSD screening phase. The  
440 experimental sheet and corresponding response values from the GSD screening and iteration  
441 2 are included as Additional file 1. Using the optimized parameter settings (Table 1), we  
442 obtained a 1.6% and 13.1% increase in the investigated responses tSeq and N50, and a 2.2%  
443 reduction in nSeq as compared to when abyss-pe was run with default settings (Table 2).  
444 Optimizing the parameters using the grid search option required 625 experiments to be run,  
445 and it resulted in the same combination of parameter settings as when using *doepipeline* (see  
446 Additional file 2 for grid search result). By comparison, *doepipeline* required 97 experiments  
447 to be run.

448 **Table 1 - Factors in the de-novo assembly case.** The four factors investigated in the de-  
449 novo assembly case are described below. The letter in parenthesis following the parameter  
450 name is the parameter used in the abyss-pe command line interface. Min and max values  
451 define the design space. \*: There is no default value explicitly specified by the ABySS

452 documentation. However here we used a k-mer size of 31 for comparison purposes. \*\*: This  
 453 refers to the square root of the median k-mer coverage, which is affected by the sequencing  
 454 depth and choice of k-mer size. The optimized values are the combination of factor values  
 455 that produced the best outcome, as found by *doepipeline*.

| Parameter                                                          | Abbr. | Type         | Min | Max | Default        | Optimized |
|--------------------------------------------------------------------|-------|--------------|-----|-----|----------------|-----------|
| Size of k-mer ( <i>k</i> )                                         | KMER  | Ordinal      | 20  | 90  | 31*            | 38        |
| Minimum mean k-mer coverage of a unitig ( <i>c</i> )               | MIKC  | Quantitative | 2   | 15  | sqrt(median)** | 8.5       |
| Minimum alignment length of a read ( <i>l</i> )                    | MIAL  | Ordinal      | 20  | 60  | 40             | 30        |
| Minimum number of pairs required for building contigs ( <i>n</i> ) | MIPA  | Ordinal      | 5   | 15  | 10             | 15        |

456

457 **Table 2 - Responses in the de-novo assembly case.** The three responses that were measured  
 458 in the de-novo assembly case are described below. \*: Responses that have the criterion  
 459 maximize have a low limit, and those with the criterion minimize have a high limit. \*\*:   
 460 Default values are based on using a k-mer size of 31 and leaving all other parameters  
 461 unchanged.

| Response                        | Abbr. | Criterion | Low/high limit* | Target    | Default** | Optimized |
|---------------------------------|-------|-----------|-----------------|-----------|-----------|-----------|
| Total sequence in assembly (bp) | tSeq  | Maximize  | 1,830,000       | 1,894,157 | 1,835,427 | 1,864,165 |
| Number of contigs in assembly   | nSeq  | Minimize  | 95              | 85        | 91        | 89        |
| N50                             | N50   | Maximize  | 28,000          | 35,000    | 28,149    | 31,847    |

462

463 **Case 2: scaffolding of a bacterial genome assembly using long reads**

464 Scaffolding is the process of connecting together contigs obtained from an assembly step. In  
465 this example we aimed to optimize parameters for the scaffolding software package  
466 SSPACE-LongRead [20], which relies on long reads to span the low-complexity regions that  
467 are typically found between the contigs of an assembly. *doepipeline* ran for three iterations  
468 before halting, obtaining the best result in the second iteration. The response values and  
469 parameter settings investigated in each iteration are included in Additional file 3. The  
470 response (N50) value obtained when using the default parameter settings was 1,141,889 bp.  
471 Using the optimized parameter settings (Table 3) resulted in a 66.9% increase in the response  
472 (1,905,883 bp). Optimizing the parameters using the grid search option required 625  
473 experiments to be run, compared to 211 experiments using *doepipeline*, and it resulted in a  
474 best N50 value of 1,868,309, which is slightly lower than the result obtained using  
475 *doepipeline* (see Additional file 4 for grid search result).

476 **Table 3 - Factors in the scaffolding case.** The four factors investigated in the scaffolding  
477 case are described below. The letter in parenthesis following the parameter name is the  
478 parameter used in the SSPACE command line interface. Min and max values define the  
479 design space. The optimized values are those that in combination produced the best outcome,  
480 as found by *doepipeline*.

| Parameter                                                                              | Abbr. | Type         | Min   | Max  | Default | Optimized |
|----------------------------------------------------------------------------------------|-------|--------------|-------|------|---------|-----------|
| Minimum alignment length to allow a contig to be included for scaffolding ( <i>a</i> ) | ALEN  | Ordinal      | 0     | 5000 | 0       | 0         |
| Minimum gap between two contigs ( <i>g</i> )                                           | GLEN  | Ordinal      | -3000 | 3000 | -200    | -750      |
| Maximum link ratio between two best contig pairs ( <i>r</i> )                          | RRAT  | Quantitative | 0.1   | 0.7  | 0.3     | 0.325     |

|                                                                                          |      |         |    |    |    |    |
|------------------------------------------------------------------------------------------|------|---------|----|----|----|----|
| Minimum identity of the alignment of the long reads to the contig sequences ( <i>i</i> ) | IDEN | Ordinal | 30 | 90 | 70 | 82 |
|------------------------------------------------------------------------------------------|------|---------|----|----|----|----|

481 **Case 3: k-mer classification**

482 K-mer classification is used to gather information about the species content of a metagenomic  
483 sample. It is possible to visualize the general distribution of species through the reads  
484 classified or to identify the presence/absence of reads classified to specific targets. By using  
485 third generation sequencing techniques, such as Oxford Nanopore, it is possible to classify  
486 reads from an unknown sample in real time. But due to the long error-prone reads produced  
487 by third-generation sequencing machines, there is a greater risk of misclassification. At the  
488 genus level this is not usually a problem. But when it comes to discriminating between  
489 pathogenic and non-pathogenic species, misclassification may become problematic; in  
490 particular false positive signals of pathogenic species may be obtained. We investigated the  
491 KrakenUniq [23] (v. 0.5.2) algorithm and used *doepipeline* to find optimized settings for long  
492 error-prone reads in order to increase the ratio of true positives to false positives using the F1-  
493 score as response. KrakenUniq also has a filter that may reduce the number of false positive  
494 reads. The filter will adjust each assigned read up the tree until the desired threshold is met,  
495 where the threshold is the number of assigned k-mers divided by the number of unique k-  
496 mers in that category [23].

497 Optimization ran for three iterations before halting and the best results were found during the  
498 second iteration. The experimental sheet and corresponding response values from the GSD  
499 screening and optimization iterations are included in Additional file 5. Using the optimized  
500 parameter settings (Table 4), we were able to increase the F1 score by 0.065% from 0.993690  
501 to 0.994341, compared to when running KrakenUniq with default settings.

502 Optimizing the parameters using the grid search option required 125 experiments to be run,  
503 compared to 76 experiments using *doepipeline*. The grid search resulted in a best F1 score of  
504 0.994169 which is slightly lower than the result obtained using *doepipeline* (see Additional  
505 file 6 for grid search result).

506 **Table 4 - Factors in the k-mer classification case.** The three factors investigated in the k-  
507 mer case are described below. Min and max values define the design space. The optimized  
508 values are those that in combination produced the best outcome, as found by *doepipeline*. \*:  
509 The KrakenUniq documentation to our knowledge does not state what the default value is.

| Parameter                                                 | Abbr. | Type         | Min | Max  | Default | Optimized |
|-----------------------------------------------------------|-------|--------------|-----|------|---------|-----------|
| Minimum k-mer hits                                        | MH    | Ordinal      | 1   | 200  | *       | 14        |
| Standard deviation of the relative errors of the estimate | PRES  | Ordinal      | 10  | 18   | 12      | 17        |
| Minimum tax-ID score threshold                            | FILT  | Quantitative | 0   | 0.05 | 0       | 0         |

510

#### 511 **Case 4: genetic variant calling**

512 Variant calling is the process of determining genetic variants (or mutations) from genetic  
513 sequence data. In this case we aimed to find optimized parameters for a widely used variant  
514 calling framework, the genome analysis toolkit (GATK). Specifically, we sequentially  
515 optimized two of the steps carried out by GATK: variant calling and variant filtering (see  
516 methods).

517 In the optimization for the first step (variant calling), *doepipeline* ran for three iterations  
518 before halting, obtaining the best result in the second iteration (F1=0.9707). In the  
519 optimization for the second step (variant filtration), *doepipeline* ran for four iterations before  
520 halting. The best result (F1=0.9716) was obtained in the fourth iteration when the optimum



521 predicted by the model was validated. This optimum was too far from the design space edges  
522 for *doepipeline* to move the design space and initiate another iteration, and thus it halted  
523 execution. The response values and parameter settings investigated in each iteration are  
524 included in Additional file 7 (variant calling step) and 8 (variant filtering step). The included  
525 parameters and their default and optimized settings are listed in Table 5.

526 As the optimization was performed only on chromosome 1, we wanted to see how well the  
527 optimized parameter settings carried over into a variant calling and filtering pipeline applied  
528 across all autosomes and chromosome X. This analysis resulted in an F1 score of 0.9713,  
529 while using the default settings resulted in an F1 score of 0.9702.

530 Optimizing the parameters using the grid search option resulted in a best F1 score of 0.9715,  
531 which is marginally lower than the results obtained using *doepipeline*. Five experiments in  
532 the first step of the grid search optimization (calling) resulted in the same highest F1 score  
533 (see Additional file 9). We therefore ran five parallel instances of the second step of  
534 optimization (filtering) using the different VCF files from the five best experiments in the  
535 first step. This inflated the number of required experiments from the expected 1250 to 3750  
536 experiments in total, compared to 280 experiments with *doepipeline*. The five parallel  
537 optimizations of step two all yielded the same set of 12 combinations of settings producing an  
538 equally high F1 score (0.9715) (see Additional file 10). Validation across all autosomes and  
539 chromosome X using all 60 combinations of parameter settings (5 times 12) yielded a best F1  
540 score of 0.9712, again marginally lower than for *doepipeline*.

541 **Table 5 - Factors in the variant calling case.** The factors investigated in the variant calling  
542 case are described below. The optimization was carried out sequentially for two main steps,  
543 variant calling and variant filtering, and which step each factor belongs to is indicated. For  
544 the variant calling step, the factor's corresponding command line flag is given in parentheses  
545 after the parameter name. For the variant filtering step, the corresponding information tag

546 annotated in the VCF file is indicated in parentheses. The min and max values define the  
 547 design space. The default values for all factors are also indicated; for the calling step they are  
 548 the build-in default values of the HaplotypeCaller tool, while for the filtering step the default  
 549 values are those recommended by the GATK team. The optimized values are those that in  
 550 combination produced the best outcome, as found by *doepipeline*.

| Step              | Parameter                                                           | Abbr. | Type         | Min | Max | Default | Optimized |
|-------------------|---------------------------------------------------------------------|-------|--------------|-----|-----|---------|-----------|
| Variant calling   | Global assumed mismatching rate for reads ( <i>globalMAPQ</i> )     | GMQ   | Ordinal      | 20  | 55  | 45      | 46        |
|                   | Minimum base quality for calling ( <i>mbq</i> )                     | MBQ   | Ordinal      | 5   | 25  | 10      | 10        |
|                   | Minimum reads per alignment start ( <i>minReadsPerAlignment</i> )   | RAS   | Ordinal      | 5   | 25  | 10      | 20        |
|                   | Minimum confidence threshold for calling ( <i>stand_call_conf</i> ) | SCC   | Quantitative | 5   | 25  | 10      | 5         |
| Variant filtering | Quality by depth ( <i>QD</i> )                                      | QD    | Quantitative | 0   | 10  | 2       | 0.41      |
|                   | Read position rank sum test ( <i>ReadPosRankSum</i> )               | RPRS  | Quantitative | -40 | 0   | -20     | -37.5     |
|                   | Fisher test for strand bias ( <i>FS</i> )                           | FS    | Quantitative | 0   | 250 | 200     | 62.5      |
|                   | Strand odds ratio ( <i>SOR</i> )                                    | SOR   | Quantitative | 0   | 20  | 10      | 8.16      |

551

## 552 Discussion

553 Selecting parameter settings for a data processing pipeline is complex, since the influence of  
 554 the parameters on the end result is not always obvious. While the value of personal and peer  
 555 experience should not be underestimated, our approach provides a systematic way of

556 determining optimal settings. Specialized tools to optimize particular bioinformatic software  
557 tools have been proposed previously. For example, VelvetOptimizer [39] can be used to  
558 optimize the k-mer and coverage cutoff parameters of the Velvet assembler [40] and  
559 KmerGenie can be used to make an informed decision on the choice of k-mer in de Bruijn  
560 based assemblers [41]. However, a generalized, software-agnostic optimization approach is  
561 preferable, especially when several tools are used together in a pipeline.

562 Here we present such a generalized strategy for automated sequential optimization of  
563 software parameters, employing core concepts of DoE methodology. We have implemented  
564 our strategy in a user-friendly python package, *doepipeline*. The optimization strategy and the  
565 use of *doepipeline* was exemplified in four bioinformatics use cases; de-novo assembly of a  
566 bacterial genome using Illumina reads, scaffolding a bacterial genome assembly using  
567 nanopore reads, k-mer classification of metagenomic third generation sequencing data, and  
568 genetic variant calling. In all four cases, we saw an improvement in the measured response  
569 variables as compared to when using the default parameter settings. The improvement of the  
570 measured responses in our examples ranged between 0.065% and 66.9%. We compared the  
571 results from *doepipeline* to results from standard grid searches, and *doepipeline* achieved  
572 equally good or better results using significantly lower numbers of evaluations/experiments.  
573 Grid search is typically limited to running a single optimization phase evaluating all points in  
574 the parameter grid with no further refinement. This is in contrast to *doepipeline*, which is  
575 adaptive and refines the parameter settings based on the best results from the previous phase,  
576 allowing it to find better performing parameter settings than grid search.

577 One of the advantages of our proposed strategy is the use of a GSD in a screening phase prior  
578 to the optimization phase. Compared to Eliasson et al[9], we are able to screen a much larger  
579 design space efficiently prior to optimization using the GSD-based approach. In order for the  
580 optimization phase to converge in a feasible number of iterations, the design space should be

581 restricted in some way. Deciding the range of each of the factors without guidance risks  
582 creating too narrow or wide a design space. Instead, the screening allows the user to set up a  
583 relaxed (wide) design space in which to investigate and to approximate the optimal factor  
584 combination. The approximation represents a substantiated initial center point around which  
585 to set up a narrower optimization design. The screening phase will also identify promising  
586 values for any qualitative factors and fix them before optimization. Thus, the GSD screening  
587 phase can be viewed as a systematic approach to restricting the design space for the  
588 subsequent optimization phase. Similar results can be achieved using stochastic optimization  
589 methods such as random search [42], commonly applied within the machine learning  
590 community. Random search can effectively reduce the number of runs required, but the final  
591 results are probabilistic and may not be optimal, depending on each particular random draw.  
592 By using structured space-filling designs, *doepipeline* deliberately spans more of the search  
593 space rather than relying on randomness. We note that the multi-phase workflow of  
594 *doepipeline* has conceptual similarities to Bayesian hyperparameter optimization [43], in  
595 refining the parameter choice based on promising parameter regions from earlier iterations.  
596 However, *doepipeline* uses statistical designs that are guaranteed to fill the parameter space  
597 and structured refinement around promising points rather than randomly sampling promising  
598 regions with higher probability.

599 The fraction of the full design that a GSD represents can be controlled with the reduction  
600 factor parameter in *doepipeline*. We ran the optimization of ABySS (case 1) with a GSD  
601 reduction factor of 8, but another optimization of ABySS where a reduction factor of 10 was  
602 used produced the same response values (data not shown) in fewer experimental runs (45 as  
603 opposed to 70). In addition, there was a degree of overlap among the response values in the  
604 GSD iterations (Additional files 1, 3, and 5). Overall, this could indicate that it is meaningful

605 to try running the GSD with a higher reduction factor than the recommended default, and/or  
606 reducing the number of levels, further reducing the number of experiments.

607 Currently, *doepipeline* leverages cloud computing capability through the Slurm workload  
608 managing system. Given the recent development and consolidation of workflow managing  
609 systems [44] it would be possible to integrate *doepipeline* with for example SnakeMake [45]  
610 or NextFlow [46], similar to other implementations [47,48].

611 During development and testing of *doepipeline* we saw the design space moving back and  
612 forth between iterations in the optimization phase. We hypothesized that this behavior was  
613 because either the underlying function was not modeled properly or the function was flat  
614 within the investigated design space. To counteract this phenomenon we implemented three  
615 features; i) no prediction of the optimal factor combination if the predictive power ( $Q^2$ ) of the  
616 model was low (default:  $Q^2 < 0.5$ ), ii) validation of the predicted optimal factor combination  
617 by carrying out the pipeline with those factor settings, and iii) shrinking the span of the  
618 factors between iterations. After implementing these three features, *doepipeline* consistently  
619 converged to satisfactory results.

620 Specifying the pipeline in a YAML file allows for flexible configurations of commands to be  
621 run, essentially enabling optimization of any pipeline run on the command line. However, the  
622 number of parameters will typically increase with the length of the pipeline under  
623 investigation. At the same time there is a soft constraint on the number of parameters that can  
624 be investigated simultaneously. This constraint will be related to the problem currently under  
625 investigation and depends on the computational complexity of the pipeline, and on the  
626 available computational and time resources. Instead of doing a global optimization of  
627 parameters, i.e. optimizing the entire pipeline at once, an alternative approach is to run  
628 sequential optimizations in which only a section of the pipeline at a time is optimized while

629 keeping the default parameter values for the rest of the pipeline [9]. This type of sequential  
630 optimization is not yet fully implemented in *doepipeline* and is a feature for future updates.  
631 Sequential optimization of a pipeline currently requires that an optimization is carried out for  
632 each step of the pipeline and that the optimized parameter values so obtained are manually  
633 updated for the subsequent steps of the pipeline.

## 634 Conclusion

635 Our proposed strategy represents a systematic approach to the optimization of software  
636 parameters. Our implementation in the software-agnostic and user-friendly package  
637 *doepipeline* could potentially serve as a starting point for experimenters and  
638 bioinformaticians who currently rely on default settings or common practice when running  
639 their data processing pipelines.

## 640 Declarations

### 641 Ethics approval and consent to participate

642 Not applicable

### 643 Availability of data and material

644 The datasets generated and analyzed during the current study (cases 1-3) are available in  
645 NCBI BioProject accessions PRJNA510899 (SRA run: SRR9290761), PRJNA16087 (SRA  
646 run: SRR518502), PRJNA548675 (SRA run: SRR9290851). The assembly used as input to  
647 case 2 is available at the *doepipeline* github (<https://github.com/clicumu/doepipeline>). The  
648 sequence data used for case 4 is available at the ENA with study accession ERP001960 (run:  
649 ERR194147), and the truth callset along with confident regions BED file is available at the  
650 Platinum Genomes github repository [29]. The GATK bundle is available at the GATK FTP  
651 <ftp://ftp.broadinstitute.org/bundle/hg19/>.

652 **Consent for publication**

653 Not applicable

654 **Competing interests**

655 The authors declare that they have no competing interests.

656 **Funding**

657 This work was funded by the Knut and Alice Wallenberg Foundation (DSv, JT) (2011.0042),  
658 the Swedish Research Council (DSv, RS, JT) (2016□04376), Sartorius AG (RS, JT), the  
659 Swedish National Strategic e-Science Research Program eSSENCE (RS, JT), the Swedish  
660 Ministry of Defence (DSu, AS) (FOI project A404018) and the Swedish Civil Contingencies  
661 Agency (DSu, AS) (FOI project B4662 B2Forensics).

662 **Authors' contributions**

663 DSv, AS and JT initiated the study, DSv and RS designed the algorithm and implemented the  
664 python code. DSv and DSu analyzed and interpreted the four example cases. All authors  
665 wrote, read and approved the final manuscript.

## 666 Acknowledgements

667 This study makes use of sequence data generated at the Swedish Defence Research Agency  
668 by Edvin Karlsson and Emelie Samuelsson-Näslund. The authors would like to acknowledge  
669 support from the Science for Life Laboratory (SciLifeLab) and the National Genomics  
670 Infrastructure (NGI) for providing assistance in massively parallel sequencing. Computations  
671 were carried out at the Uppsala Multidisciplinary Center for Advanced Computational  
672 Science (UPPMAX) and the High Performance Computing Center North (HPC2N), part of  
673 the Swedish National Infrastructure for Computing (SNIC). The authors thank Matilda  
674 Rentoft and Mattias Eliasson for fruitful discussions.

## 675 References

- 676 1. DePristo MA, Banks E, Poplin R, Garimella K V, Maguire JR, Hartl C, et al. A framework for  
677 variation discovery and genotyping using next-generation DNA sequencing data. *Nat Genet*  
678 [Internet]. 2011 May [cited 2018 Jan 17];43(5):491–8. Available from:  
679 <http://www.ncbi.nlm.nih.gov/pubmed/21478889>
- 680 2. Van der Auwera GA, Carneiro MO, Hartl C, Poplin R, Del Angel G, Levy-Moonshine A, et al.  
681 From FastQ data to high confidence variant calls: the Genome Analysis Toolkit best practices  
682 pipeline. *Curr Protoc Bioinforma* [Internet]. 2013 [cited 2018 Jan 17];43(1110):11.10.1-33.  
683 Available from: <http://www.ncbi.nlm.nih.gov/pubmed/25431634>
- 684 3. Li H. Minimap2: pairwise alignment for nucleotide sequences. *Bioinformatics* [Internet]. 2018  
685 [cited 2018 Dec 20];34(18):3094–100. Available from:  
686 <http://www.ncbi.nlm.nih.gov/pubmed/29750242>
- 687 4. Fisher RA. *The design of experiments*. Edinburgh/London: Oliver and Boyd; 1935.
- 688 5. Eriksson L, Johansson E, Kettaneh-Wold N, Wikström C, Wold S. *Design of experiments* □:  
689 principles and applications [Internet]. Umeå: Umetrics Academy; 2008. Available from:  
690 <http://www.umetrics.com>



- 691 6. Box GEP, Hunter WG, Hunter JS. Statistics for experimenters□: an introduction to design,  
692 data analysis, and model building. New York: Wiley; 1978. (Wiley series in probability and  
693 mathematical statistics, 0277-2728).
- 694 7. Dismuke C, Lindrooth R. Ordinary least squares. *Methods Des Outcomes Res.* 2006;93:93–  
695 104.
- 696 8. Surowiec I, Vikström L, Hector G, Johansson E, Vikström C, Trygg J. Generalized Subset  
697 Designs in Analytical Chemistry. *Anal Chem.* 2017;89(12):6491–7.
- 698 9. Eliasson M, Rännar S, Madsen R, Donten MA, Marsden-Edwards E, Moritz T, et al. Strategy  
699 for Optimizing LC-MS Data Processing in Metabolomics: A Design of Experiments  
700 Approach. *Anal Chem [Internet].* 2012 Aug 7 [cited 2019 Apr 18];84(15):6869–76. Available  
701 from: <http://www.ncbi.nlm.nih.gov/pubmed/22823568>
- 702 10. Derringer G, Suich R. Simultaneous Optimization of Several Response Variables. *J Qual*  
703 *Technol [Internet].* 1980 Oct 22 [cited 2018 Mar 2];12(4):214–9. Available from:  
704 <https://www.tandfonline.com/doi/full/10.1080/00224065.1980.11980968>
- 705 11. Svensson K, Sjödin A, Byström M, Granberg M, Brittnacher MJ, Rohmer L, et al. Genome  
706 sequence of *Francisella tularensis* subspecies holarctica strain FSC200, isolated from a child  
707 with tularemia. *J Bacteriol [Internet].* 2012 Dec [cited 2018 Dec 19];194(24):6965–6.  
708 Available from: <http://www.ncbi.nlm.nih.gov/pubmed/23209222>
- 709 12. seqtk [Internet]. Available from: <https://github.com/lh3/seqtk>
- 710 13. Grüning B, Dale R, Sjödin A, Chapman BA, Rowe J, Tomkins-Tinch CH, et al. Bioconda:  
711 sustainable and comprehensive software distribution for the life sciences. *Nat Methods*  
712 *[Internet].* 2018 Jul 2 [cited 2018 Dec 20];15(7):475–6. Available from:  
713 <http://www.nature.com/articles/s41592-018-0046-7>
- 714 14. Simpson JT, Wong K, Jackman SD, Schein JE, Jones SJ, Birol I. ABySS: A parallel assembler  
715 for short read sequence data. [cited 2018 Jun 14]; Available from: [www.genome.org](http://www.genome.org).
- 716 15. Jackman SD, Vandervalk BP, Mohamadi H, Chu J, Yeo S, Hammond SA, et al. ABySS 2.0:  
717 resource-efficient assembly of large genomes using a Bloom filter. *Genome Res [Internet].*  
718 2017 [cited 2018 Dec 19];27(5):768–77. Available from:

- 719 <http://www.ncbi.nlm.nih.gov/pubmed/28232478>
- 720 16. Earl D, Bradnam K, St John J, Darling A, Lin D, Fass J, et al. Assemblathon 1: a competitive  
721 assessment of de novo short read assembly methods. *Genome Res* [Internet]. 2011 Dec 1 [cited  
722 2018 Dec 20];21(12):2224–41. Available from:  
723 <http://www.ncbi.nlm.nih.gov/pubmed/21926179>
- 724 17. Bradnam KR, Fass JN, Alexandrov A, Baranay P, Bechner M, Birol I, et al. Assemblathon 2:  
725 evaluating de novo methods of genome assembly in three vertebrate species. *Gigascience*  
726 [Internet]. 2013 [cited 2018 Dec 12];2(1):10. Available from: <http://arxiv.org/abs/1301.5406>
- 727 18. Fastaq [Internet]. Available from: <https://github.com/sanger-pathogens/Fastaq>
- 728 19. seqstats [Internet]. Available from: <https://github.com/clwgg/seqstats>
- 729 20. Boetzer M, Pirovano W. SSPACE-LongRead: scaffolding bacterial draft genomes using long  
730 read sequence information. *BMC Bioinformatics* [Internet]. 2014 Jun 20 [cited 2018 Jul  
731 27];15(1):211. Available from:  
732 <http://bmcbioinformatics.biomedcentral.com/articles/10.1186/1471-2105-15-211>
- 733 21. Breitwieser FP, Lu J, Salzberg SL. A review of methods and databases for metagenomic  
734 classification and assembly. *Brief Bioinform* [Internet]. 2017 Sep 23 [cited 2018 Dec 20];  
735 Available from: <http://www.ncbi.nlm.nih.gov/pubmed/29028872>
- 736 22. Wood DE, Salzberg SL. Kraken: ultrafast metagenomic sequence classification using exact  
737 alignments. *Genome Biol* [Internet]. 2014 Mar 3 [cited 2018 Dec 19];15(3):R46. Available  
738 from: <http://genomebiology.biomedcentral.com/articles/10.1186/gb-2014-15-3-r46>
- 739 23. Breitwieser FP, Baker DN, Salzberg SL. KrakenUniq: confident and fast metagenomics  
740 classification using unique k-mer counts. *Genome Biol* [Internet]. 2018 Dec 16 [cited 2018  
741 Dec 20];19(1):198. Available from:  
742 <https://genomebiology.biomedcentral.com/articles/10.1186/s13059-018-1568-0>
- 743 24. Supernat A, Vidarsson OV, Steen VM, Stokowy T. Comparison of three variant callers for  
744 human whole genome sequencing. *Sci Rep* [Internet]. 2018 Dec 14 [cited 2019 May  
745 9];8(1):17851. Available from: <http://www.ncbi.nlm.nih.gov/pubmed/30552369>
- 746 25. Eberle MA, Fritzilas E, Krusche P, Källberg M, Moore BL, Bekritsky MA, et al. A reference

- 747 data set of 5.4 million phased human variants validated by genetic inheritance from sequencing  
748 a three-generation 17-member pedigree. *Genome Res.* 2017;27(1):157–64.
- 749 26. Zook JM, Chapman B, Wang J, Mittelman D, Hofmann O, Hide W, et al. Integrating human  
750 sequence data sets provides a resource of benchmark SNP and indel genotype calls. *Nat*  
751 *Biotechnol* [Internet]. 2014 Mar [cited 2014 Jul 19];32(3):246–51. Available from:  
752 <http://www.ncbi.nlm.nih.gov/pubmed/24531798>
- 753 27. Zook JM, McDaniel J, Parikh H, Heaton H, Irvine SA, Trigg L, et al. Reproducible integration  
754 of multiple sequencing datasets to form high-confidence SNP, indel, and reference calls for  
755 five human genome reference materials. *bioRxiv* [Internet]. 2018 Mar 13 [cited 2019 May  
756 8];281006. Available from: <https://www.biorxiv.org/content/10.1101/281006v1>
- 757 28. Krusche P, Trigg L, Boutros PC, Mason CE, Vega FMD La, Moore BL, et al. Best Practices  
758 for Benchmarking Germline Small Variant Calls in Human Genomes. *bioRxiv* [Internet]. 2018  
759 Feb 23 [cited 2019 May 8];270157. Available from:  
760 <https://www.biorxiv.org/content/10.1101/270157v1.full>
- 761 29. Platinum Genomes GitHub repository / hg19 hybrid truth set [Internet]. Available from:  
762 <https://illumina.github.io/PlatinumGenomes/?prefix=2017-1.0/hg19/hybrid>
- 763 30. Picard [Internet]. Available from: <http://broadinstitute.github.io/picard>
- 764 31. Li H, Durbin R. Fast and accurate short read alignment with Burrows-Wheeler transform.  
765 *Bioinformatics* [Internet]. 2009 Jul 15 [cited 2018 Jul 5];25(14):1754–60. Available from:  
766 <http://www.ncbi.nlm.nih.gov/pubmed/19451168>
- 767 32. Li H. Aligning sequence reads, clone sequences and assembly contigs with BWA-MEM. 2013  
768 Mar 16 [cited 2019 May 8]; Available from: <http://arxiv.org/abs/1303.3997>
- 769 33. McKenna A, Hanna M, Banks E, Sivachenko A, Cibulskis K, Kernytsky A, et al. The Genome  
770 Analysis Toolkit: a MapReduce framework for analyzing next-generation DNA sequencing  
771 data. *Genome Res* [Internet]. 2010 Sep [cited 2018 Jul 5];20(9):1297–303. Available from:  
772 <http://www.ncbi.nlm.nih.gov/pubmed/20644199>
- 773 34. Krusche P. Haplotype comparison tools / hap.py [Internet]. Available from:  
774 <http://github.com/illumina/hap.py>

- 775 35. conda-forge [Internet]. Available from: <https://conda-forge.org/>
- 776 36. doepipeline (conda-forge) [Internet]. Available from: [https://anaconda.org/conda-](https://anaconda.org/conda-forge/doepipeline)  
777 [forge/doepipeline](https://anaconda.org/conda-forge/doepipeline)
- 778 37. PyDOE2 [Internet]. Available from: <https://github.com/clicumu/pyDOE2>
- 779 38. Yoo AB, Jette MA, Grondona M. SLURM: Simple Linux Utility for Resource Management.  
780 In Springer, Berlin, Heidelberg; 2003 [cited 2018 Dec 19]. p. 44–60. Available from:  
781 [http://link.springer.com/10.1007/10968987\\_3](http://link.springer.com/10.1007/10968987_3)
- 782 39. VelvetOptimizer [Internet]. Available from: <https://github.com/tseemann/VelvetOptimiser>
- 783 40. Zerbino DR, Birney E. Velvet: algorithms for de novo short read assembly using de Bruijn  
784 graphs. *Genome Res* [Internet]. 2008 May 1 [cited 2018 Dec 20];18(5):821–9. Available from:  
785 <http://www.ncbi.nlm.nih.gov/pubmed/18349386>
- 786 41. Chikhi R, Medvedev P. Informed and automated k-mer size selection for genome assembly.  
787 *Bioinformatics* [Internet]. 2014 Jan 1 [cited 2018 Dec 12];30(1):31–7. Available from:  
788 <https://academic.oup.com/bioinformatics/article-lookup/doi/10.1093/bioinformatics/btt310>
- 789 42. Bergstra J, Bengio Y. Random search for hyper-parameter optimization. *J Mach Learn Res*  
790 [Internet]. 2012;13:281–305. Available from: [papers3://publication/uuid/1190E1AB-0319-](papers3://publication/uuid/1190E1AB-0319-40C5-81CD-7207784965DE)  
791 [40C5-81CD-7207784965DE](papers3://publication/uuid/1190E1AB-0319-40C5-81CD-7207784965DE)
- 792 43. Snoek J, Larochelle H, Adams RP. Practical Bayesian Optimization of Machine Learning  
793 Algorithms. *Adv Neural Inf Process Syst* [Internet]. 2012 Jun 13 [cited 2019 Jun 6]; Available  
794 from: <http://arxiv.org/abs/1206.2944>
- 795 44. Karim MR, Michel A, Zappa A, Baranov P, Sahay R, Rebholz-Schuhmann D. Improving data  
796 workflow systems with cloud services and use of open data for bioinformatics research. *Brief*  
797 *Bioinform* [Internet]. 2018 Sep 28 [cited 2019 Jun 20];19(5):1035–50. Available from:  
798 <https://academic.oup.com/bib/article/19/5/1035/3737318>
- 799 45. Koster J, Rahmann S. Snakemake--a scalable bioinformatics workflow engine. *Bioinformatics*  
800 [Internet]. 2012 Oct 1 [cited 2019 Jun 20];28(19):2520–2. Available from:  
801 <https://academic.oup.com/bioinformatics/article-lookup/doi/10.1093/bioinformatics/bts480>
- 802 46. Di Tommaso P, Chatzou M, Floden EW, Barja PP, Palumbo E, Notredame C. Nextflow

803 enables reproducible computational workflows. Nat Biotechnol [Internet]. 2017 Apr 1 [cited  
804 2019 Jun 20];35(4):316–9. Available from: <http://www.nature.com/articles/nbt.3820>  
805 47. Holl S, Mohammed Y, Zimmermann O, Palmblad M. Scientific workflow optimization for  
806 improved peptide and protein identification. BMC Bioinformatics [Internet]. 2015 Dec 3 [cited  
807 2019 Jun 20];16(1):284. Available from:  
808 <http://bmcbioinformatics.biomedcentral.com/articles/10.1186/s12859-015-0714-x>  
809 48. Palmblad M, Lamprecht A-L, Ison J, Schwämmle V. Automated workflow composition in  
810 mass spectrometry-based proteomics. Wren J, editor. Bioinformatics [Internet]. 2019 Feb 15  
811 [cited 2019 Jun 20];35(4):656–64. Available from:  
812 <https://academic.oup.com/bioinformatics/article/35/4/656/5060940>

813

## 814 Additional material

### 815 **Additional file 1**

816 Excel file (.xlsx).

817 Complete experimental sheets for case 1, *doepipeline* iterations 1 and 2. Contains factor  
818 settings and response values for all experiments in these iterations.

### 819 **Additional file 2**

820 Excel file (.xlsx).

821 Complete experimental sheet for case 1, grid search. Contains factor settings and response  
822 values for all executed experiments.

### 823 **Additional file 3**

824 Excel file (.xlsx).

825 Complete experimental sheets for case 2, *doepipeline* iterations 1, 2, and 3. Contains factor  
826 settings and response values for all experiments in these iterations.

### 827 **Additional file 4**

828 Excel file (.xlsx).

829 Complete experimental sheets for case 2, grid search. Contains factor settings and response  
830 values for all executed experiments.

831 **Additional file 5**

832 Excel file (.xlsx).

833 Complete experimental sheets for case 3, *doepipeline* iterations 1, 2, and 3. Contains factor  
834 settings and response values for all experiments in these iterations.

835 **Additional file 6**

836 Excel file (.xlsx).

837 Complete experimental sheet for case 3, grid search. Contains factor settings and response  
838 values for all executed experiments.

839 **Additional file 7**

840 Excel file (.xlsx).

841 Complete experimental sheets for case 4, step 1, *doepipeline* iterations 1, 2, and 3. Contains  
842 factor settings and response values for all experiments in these iterations.

843 **Additional file 8**

844 Excel file (.xlsx).

845 Complete experimental sheets for case 4, step 2, *doepipeline* iterations 1, 2, 3, and 4.  
846 Contains factor settings and response values for all experiments in these iterations.

847 **Additional file 9**

848 Excel file (.xlsx).

849 Complete experimental sheet for case 4, step 1, grid search. Contains factor settings and  
850 response values for all executed experiments.

851 **Additional file 10**

852 Excel file (.xlsx).

853 Complete experimental sheet for case 4, step 2, grid search. Contains factor settings and  
854 response values for all executed experiments.  
855

**(a)****Screening phase**

iteration 1

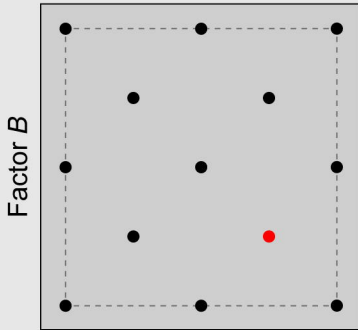

Factor A

**(b)****Optimization phase**

iteration 2

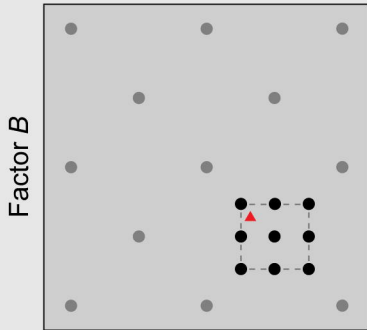

Factor A

iteration 3

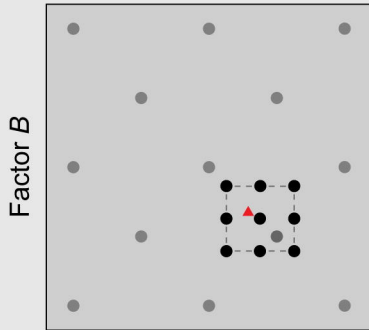

Factor A
